# Supplementary material for: Construction of Orthogonal Modular Proteinaceous Nanovaccine Delivery Vectors Based on mSA-Biotin Binding
Source: MDPI journal article supplement (doi:10.3390/nano12050734), 2022-02-22
Supplement: s1 [file s1]

## Supplementary Materials

# **Construction of orthogonal modular proteinaceous nanovaccine delivery vectors based on mSA-biotin binding**

**Yixin Shi <sup>1,2,†</sup>, Chao Pan <sup>2,†</sup>, Kangfeng Wang <sup>2,3</sup>, Peng Sun <sup>2</sup>, Jun Wu <sup>2</sup>, Yan Liu <sup>2</sup>, Yange Sun <sup>2</sup>, Yan Guo <sup>2</sup>, Ying Lu <sup>1,\*</sup>, Li Zhu <sup>2,\*</sup> and Hengliang Wang <sup>2,\*</sup>**

<sup>1</sup> College of Food Science and Technology, Shanghai Ocean University, 999 Hucheng Huan Road, LinGang New City, Shanghai 201306, China; syxsyx0906@163.com(Y.S.)

<sup>2</sup> State Key Laboratory of Pathogen and Biosecurity, Beijing Institute of Biotechnology, 20 Dongdajie Street, Fengtai District, Beijing 100071, China; panchaosunnnny@163.com(C.P.); sunpeng990718@163.com(P.S.); junwu1969@163.com(J.W.); liuyanAMS@163.com(Y.L.); sunyg1995@163.com(Y.S.); yanguobrilliant@163.com(Y.G.)

<sup>3</sup> College of Life Science, Hebei University, 180 Wusi East Road, Baoding 071002, China; wangkf1220@126.com(K.W.)

\* Correspondence: y-lu@shou.edu.cn(Y.L.); jewly54@126.com(L.Z.); wanghl@bmi.ac.cn(H.W.)

† Yixin Shi and Chao Pan contributed equally to this work and share first authorship.

**Table S1.** Primers used in this study.

| Primer      | Sequence (5'→3')                     |
|-------------|--------------------------------------|
| rfc-up-f    | <u>CGGGATCC</u> GGTGGAAGATTACTGG     |
| rfc-up-r    | GCGTCGACA <u>AAAACTGATAATCGCACCG</u> |
| rfc-down-f  | <u>CCAAGCTT</u> TAGGCGTTGTAGTTTT     |
| rfc-down-r  | <u>CCCTCGAGATACATAAGCCCCTCA</u>      |
| rfc-out-f   | ATAGCTAATGCCTTAGCTGATGATAGCTTTG      |
| rfc-out-r   | AGGTTGCTGCACATATAAAACCAACAATGTT      |
| rfc-in-f    | GTGCTTGCGATATTATTGAC                 |
| rfc-in-r    | AACCAAATCCTCTTCCAAAC                 |
| walI-up-f   | <u>CGGGATCC</u> GGGTATGGGAAGAATCAAG  |
| walI-up-r   | GCGTCGACTCAGAAATGCTACGGTGT           |
| walI-down-f | <u>CCAAGCTT</u> TGGACCTTTAGACAATCAA  |
| walI-down-r | <u>CCCTCGAGATGTTAGGAAGCATACCG</u>    |
| walI-out-f  | CTACAGATGCTGGCGAATA                  |
| walI-out-r  | TCACTACAGTTGGGATGG                   |
| walI-in-f   | TGGGTGGGATTACAAGGT                   |
| walI-in-r   | CCAATGACTAACACGGAAA                  |
| kan-in-f    | GGCACAACAGACAATCGGCT                 |
| kan-in-r    | CCTTCCCGCTTCAGTGACAA                 |

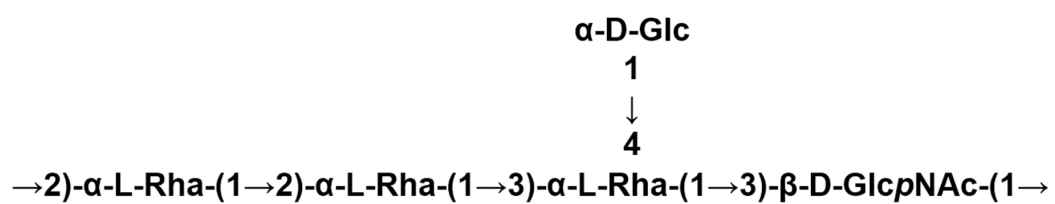

**Figure S1.** Structure diagram of the polysaccharide repeat unit of the *Shigella flexneri* 301 O-polysaccharide.

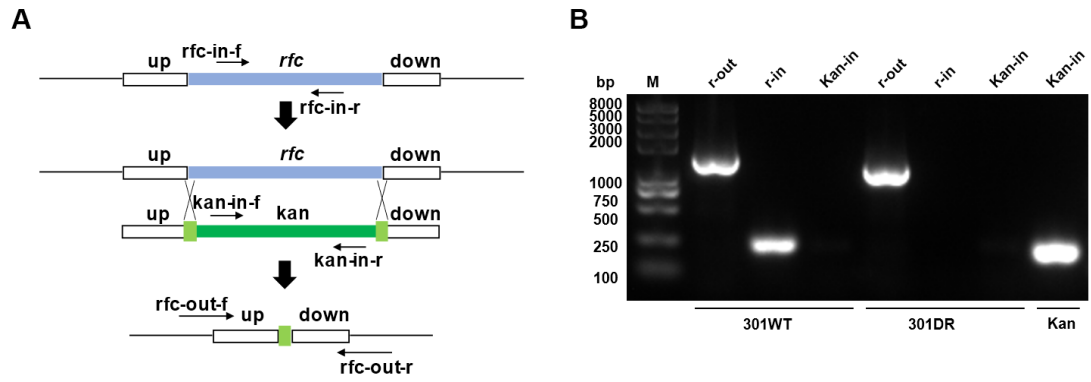

**Figure S2.** Flow chart of knock out of *rfc* (A) and PCR analysis of mutants in 301DR using primers *rfc-out-f/r*, *rfc-in-f/r* and *kan-in-f/r*.

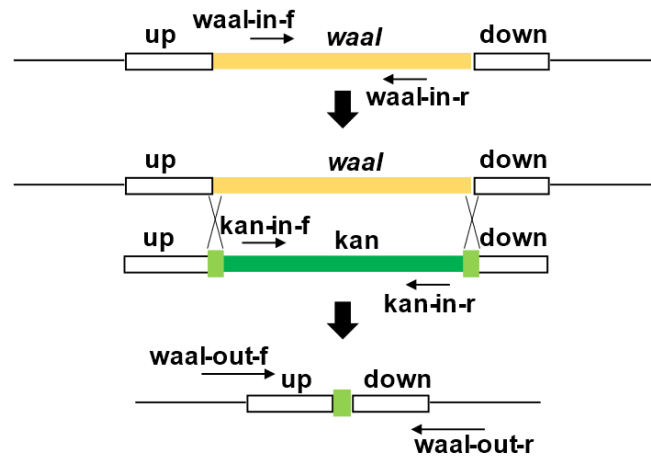

**Figure S3.** Flow chart of knock out of *waalI*.

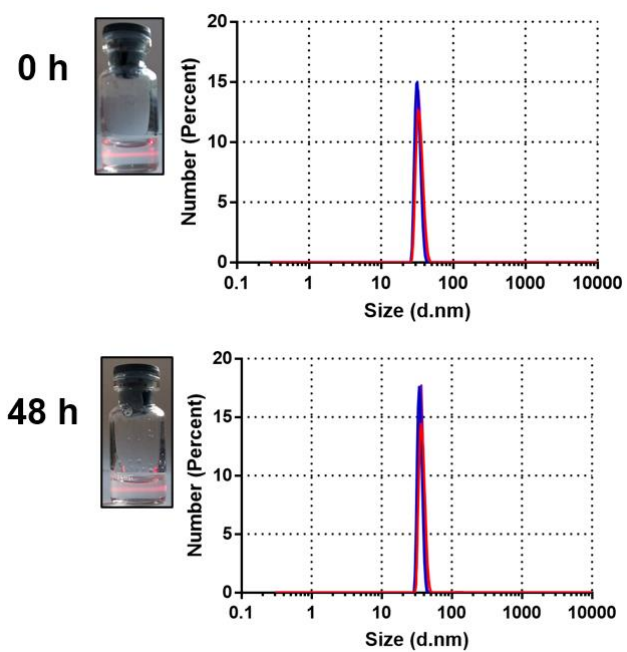

**Figure S4.** Photographs of the Tyndall effect of NP-RU in solution and its size distribution before and after being placed 37°C for 48 h.

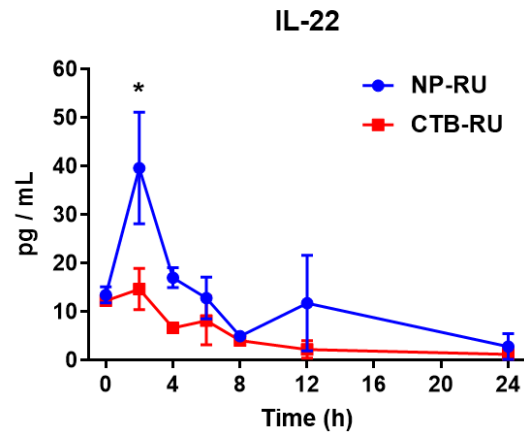

**Figure S5.** 2  $\mu$ g of sample was injected subcutaneously in mice and the dynamic change of cytokines IL-22 in the plasma was analyzed using the liquichip method.

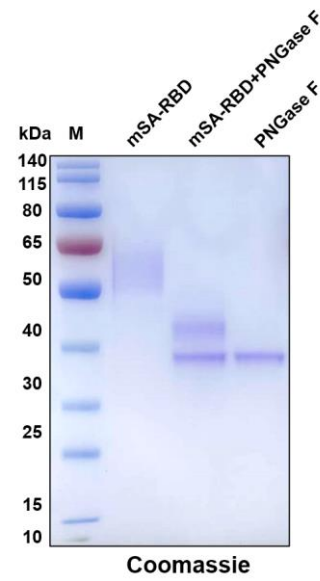

**Figure S6.** Coomassie blue staining was used to detect glycosylated mSA-RBD incubated with or without PNGase F.



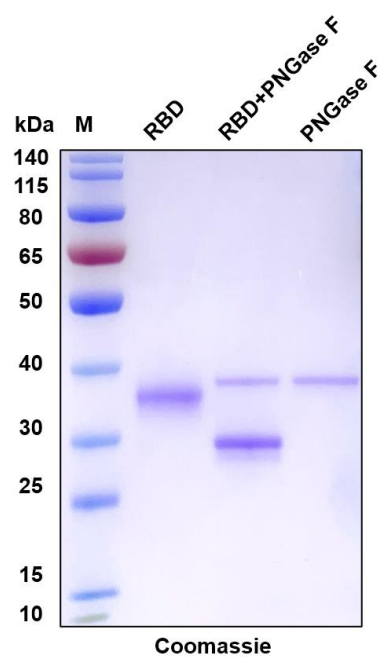

**Figure S7.** Coomassie blue staining was used to detect glycosylated RBD incubated with or without PNGase F.

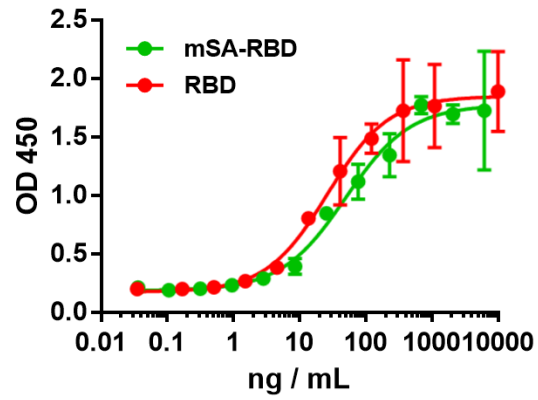

**Figure S8.** Functional ELISA was performed to measure the binding capacity of RBD or mSA-RBD produced in mammalian cells to human ACE2. The 96-well plate was coated at 2  $\mu\text{g}$  / mL (100  $\mu\text{L}$  / well). RBD and mSA-RBD was diluted from 10  $\mu\text{g}$  / mL as indicated.

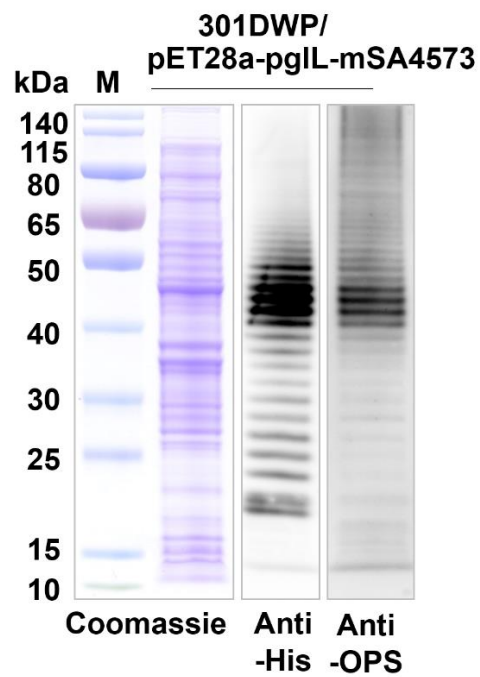

**Figure S9.** Coomassie blue staining and Western blot analysis of the expression of mSA loaded with polysaccharide antigen.
